# Supplementary material
Source: Research Square preprint supplement (doi:10.21203/rs.3.rs-9692121/v1)
Supplement: Supplementary file 1 [file 099c0b23b5cbeca23b717c3b.docx]

**Appendix A: De-identified Interview Transcripts (Raw Data)**

**This section presents de-identified raw interview data. No coding, categorization, or thematic analysis has been applied at this stage.**

**Theme: Lived Experience and Personal Perception of Water
Question: How do individuals experience the presence of water in their everyday lives?**

**Participant ID: P1**
**Gender: Male | Age: 68**
The participant described water as present in numerous aspects of everyday life, including eating, performing ablution, farming, bathing, and observing natural bodies such as the sea. He emphasized that water is encountered continuously across different contexts, making it an inseparable part of daily experience.

**Participant ID: P2**
**Gender: Female | Age: 58**
The participant explained that water accompanies her throughout daily life, from eating and washing to moments of thirst and rainfall. She described water as something constantly felt and experienced in both routine and natural situations.

**Participant ID: P3**
**Gender: Male | Age: 61**
The participant reflected on a recent change in his work environment, where losing direct access to water increased his awareness of its value. Sharing water resources with others made him more conscious of its use, particularly for maintaining cleanliness in his shop.

**Participant ID: P4**
**Gender: Male | Age: 66**
As a farmer, the participant described water as central to his daily activities. Irrigation of farmland several times a week makes water a core element of his work and livelihood, deeply embedded in his everyday experience.

**Participant ID: P5**
**Gender: Female | Age: 40**
The participant associated water primarily with hygiene practices, including washing hands, personal cleanliness, laundry, and drinking. She framed water as essential for maintaining daily cleanliness and basic health.

**Participant ID: P6**
**Gender: Female | Age: 50**
The participant emphasized water’s role in personal hygiene and cooking, particularly in households with children. She noted that water is crucial for maintaining health and that life becomes significantly difficult in its absence.

**Participant ID: P7**
**Gender: Male | Age: 45**
The participant described his experience of water as beginning with daily ablution before prayer. This routine gives water a symbolic role, representing renewal, purity, and blessing within his everyday life.

**Participant ID: P8**
**Gender: Female | Age: 50**
The participant experienced water mainly through agricultural activities such as irrigating farmland and gardens. While water at home felt ordinary, its presence in natural settings, such as rivers, carried a stronger and more meaningful impact.

**Participant ID: P9**
**Gender: Male | Age: 61**
The participant described water as the source of vitality and life, referencing religious teachings that emphasize its fundamental role in existence. He stressed that water is present in every aspect of life and cannot be separated from it.

**Participant ID: P10**
**Gender: Male | Age: 51**
The participant highlighted the omnipresence of water in daily life, including drinking, cooking, agriculture, and personal hygiene. He also noted that sensory experiences—such as the sound and sight of water—create a sense of peace and tranquility.

**Participant ID: P11**
**Gender: Male | Age: 50**
The participant associated water strongly with experiences of scarcity, particularly during Ramadan. He emphasized that when water is limited, daily life becomes difficult, hygiene decreases, and feelings of discomfort and pollution increase.

**Participant ID: P12**
**Gender: Male | Age: 50**
The participant described water as a vital form of energy that must be carefully managed. He emphasized avoiding waste and expressed emotional responses, such as sadness, when rainfall is insufficient. Water is used across daily activities, including cleaning and personal care.

**Participant ID: P13**
**Gender: Female | Age: 50**
The participant highlighted water’s importance in cooking and maintaining hygiene. She emphasized that without water, diseases increase and cleanliness cannot be maintained, making it essential for everyday living.

**Participant ID: P14**
**Gender: Female | Age: 50**
The participant described water as essential for daily routines such as washing, bathing, and preparing tea. She emphasized that without water, daily activities would come to a halt, underlining its practical necessity.

**Participant ID: P15**
**Gender: Male | Age: 55**
The participant described water as an indispensable part of daily life, used for drinking, washing, and cleaning dishes. He emphasized that he cannot recall a single day without interacting with water.

**Participant ID: P16**
**Gender: Male | Age: 61**
The participant described water as present in every moment of life, from morning ablution to daily hydration, bathing, washing clothes, and watering plants. He emphasized its continuous and unavoidable presence in everyday routines.

**Theme: Personal and Inner Meanings of Water**
**Question: What personal or inner feelings and meanings does water evoke for individuals?**

**Participant ID: P1**
**Gender: Male | Age: 68**
Water is the source of life; without it, life is impossible.

**Participant ID: P2**
**Gender: Female | Age: 58**
Water means purity; whenever I drink water, I thank God because I see it as a blessing.

**Participant ID: P3**
**Gender: Male | Age: 61**
In everyday life, water is usually associated with quenching thirst, but for me it is more about cleanliness and purification.

**Participant ID: P4**
**Gender: Male | Age: 66**
My feelings toward water are tied to irrigating my farm; the growth of my crops depends on water.

**Participant ID: P5**
**Gender: Female | Age: 40**
Water gives a sense of purity and life. Without it, nothing could be cleaned and we would not survive.

**Participant ID: P6**
**Gender: Female | Age: 50**
Water creates calmness; drinking water or washing hands and face reduces anger.

**Participant ID: P7**
**Gender: Male | Age: 45**
For me, water means life itself and brings an inherent sense of peace.

**Participant ID: P8**
**Gender: Female | Age: 50**
Mainly it means quenching thirst and cleanliness; seeing flowing water makes me feel alive.

**Participant ID: P9**
**Gender: Male | Age: 61**
Seeing, hearing, drinking, showering with water—all create deep calmness.

**Participant ID: P10**
**Gender: Male | Age: 51**
Water reminds me of simplicity, blessing, and the warmth of the past; as long as water exists, hope exists.

**Participant ID: P11**
**Gender: Male | Age: 50**
Water is life itself; it brings joy, vitality, and security.

**Participant ID: P12**
**Gender: Male | Age: 50**
Rain, the sea, and even drinking water create positive energy and calmness.

**Participant ID: P13**
**Gender: Female | Age: 50**
Water symbolizes life and flow; it makes me feel lively and alive.

**Participant ID: P14**
**Gender: Female | Age: 50**
I love water; without washing my face in the morning I feel dull. Water is a divine gift.

**Participant ID: P15**
**Gender: Male | Age: 55**
Water represents purity; no living being exists without it. It gives humans beauty and life.

**Participant ID: P16**
**Gender: Male | Age: 61**
Hearing the word water evokes life, purity, and freshness; it is life-giving for all beings.

**Theme: Personal and Inner Meanings of Water**
**Question: What personal or inner feelings and meanings does water evoke for individuals?**

**Participant ID: P1**
**Gender: Male | Age: 68**
Water is the source of life; without it, life is impossible.

**Participant ID: P2**
**Gender: Female | Age: 58**
Water means purity; whenever I drink water, I thank God because I see it as a blessing.

**Participant ID: P3**
**Gender: Male | Age: 61**
In everyday life, water is usually associated with quenching thirst, but for me it is more about cleanliness and purification.

**Participant ID: P4**
**Gender: Male | Age: 66**
My feelings toward water are tied to irrigating my farm; the growth of my crops depends on water.

**Participant ID: P5**
**Gender: Female | Age: 40**
Water gives a sense of purity and life. Without it, nothing could be cleaned and we would not survive.

**Participant ID: P6**
**Gender: Female | Age: 50**
Water creates calmness; drinking water or washing hands and face reduces anger.

**Participant ID: P7**
**Gender: Male | Age: 45**
For me, water means life itself and brings an inherent sense of peace.

**Participant ID: P8**
**Gender: Female | Age: 50**
Mainly it means quenching thirst and cleanliness; seeing flowing water makes me feel alive.

**Participant ID: P9**
**Gender: Male | Age: 61**
Seeing, hearing, drinking, showering with water—all create deep calmness.

**Participant ID: P10**
**Gender: Male | Age: 51**
Water reminds me of simplicity, blessing, and the warmth of the past; as long as water exists, hope exists.

**Participant ID: P11**
**Gender: Male | Age: 50**
Water is life itself; it brings joy, vitality, and security.

**Participant ID: P12**
**Gender: Male | Age: 50**
Rain, the sea, and even drinking water create positive energy and calmness.

**Participant ID: P13**
**Gender: Female | Age: 50**
Water symbolizes life and flow; it makes me feel lively and alive.

**Participant ID: P14**
**Gender: Female | Age: 50**
I love water; without washing my face in the morning I feel dull. Water is a divine gift.

**Participant ID: P15**
**Gender: Male | Age: 55**
Water represents purity; no living being exists without it. It gives humans beauty and life.

**Participant ID: P16**
**Gender: Male | Age: 61**
Hearing the word water evokes life, purity, and freshness; it is life-giving for all beings.

**Theme: Water and Connection to the Sacred / Spiritual Realm**
**Question: Does water remind individuals of a connection with the sacred or spiritual realm?**

**Participant ID: P1**
**Gender: Male | Age: 68**
We have been told since the past that water is sacred and pure; it is one of God’s greatest blessings.

**Participant ID: P2**
**Gender: Female | Age: 58**
Yes, water is a gift from God.

**Participant ID: P3**
**Gender: Male | Age: 61**
Cleaning my shop with water every morning brings blessing and livelihood.

**Participant ID: P4**
**Gender: Male | Age: 66**
As a farmer, I feel emotionally connected to my crops; keeping them from thirst is a moral duty.

**Participant ID: P5**
**Gender: Female | Age: 40**
I don’t see it as sacred, but it improves my mood.

**Participant ID: P6**
**Gender: Female | Age: 50**
Even a leaking tap bothers me; wasting water feels like losing something vital.

**Participant ID: P7**
**Gender: Male | Age: 45**
Water is deeply tied to Karbala and Imam Hussein; touching water recalls sacred thirst.

**Participant ID: P8**
**Gender: Female | Age: 50**
Water cleanses sins; ritual washing symbolizes spiritual lightness.

**Participant ID: P9**
**Gender: Male | Age: 61**
Raindrops feel like angels bringing joy and hope.

**Participant ID: P10**
**Gender: Male | Age: 51**
Water has always had a spiritual meaning for me and creates closeness to God.

**Participant ID: P11**
**Gender: Male | Age: 50**
Water is sacred because life itself is sacred.

**Participant ID: P12**
**Gender: Male | Age: 50**
Water is sacred because it enables life.

**Participant ID: P13**
**Gender: Female | Age: 50**
Not sacred, but it reminds me of religious teachings about cleanliness.

**Participant ID: P14**
**Gender: Female | Age: 50**
Ablution, ritual washing, and cleanliness all rely on water, making it sacred.

**Participant ID: P15**
**Gender: Male | Age: 55**
Water is divine mercy; the Qur’an repeatedly emphasizes its life-giving role.

**Participant ID: P16**
**Gender: Male | Age: 61**
Since childhood, we were taught water is sacred and purifying in religious teachings.

**Theme: Water and Connection to the Sacred / Spiritual Realm**
**Question: Does water remind individuals of a connection with the sacred or spiritual realm?**

**Participant ID: P1**
**Gender: Male | Age: 68**
We have been told since the past that water is sacred and pure; it is one of God’s greatest blessings.

**Participant ID: P2**
**Gender: Female | Age: 58**
Yes, water is a gift from God.

**Participant ID: P3**
**Gender: Male | Age: 61**
Cleaning my shop with water every morning brings blessing and livelihood.

**Participant ID: P4**
**Gender: Male | Age: 66**
As a farmer, I feel emotionally connected to my crops; keeping them from thirst is a moral duty.

**Participant ID: P5**
**Gender: Female | Age: 40**
I don’t see it as sacred, but it improves my mood.

**Participant ID: P6**
**Gender: Female | Age: 50**
Even a leaking tap bothers me; wasting water feels like losing something vital.

**Participant ID: P7**
**Gender: Male | Age: 45**
Water is deeply tied to Karbala and Imam Hussein; touching water recalls sacred thirst.

**Participant ID: P8**
**Gender: Female | Age: 50**
Water cleanses sins; ritual washing symbolizes spiritual lightness.

**Participant ID: P9**
**Gender: Male | Age: 61**
Raindrops feel like angels bringing joy and hope.

**Participant ID: P10**
**Gender: Male | Age: 51**
Water has always had a spiritual meaning for me and creates closeness to God.

**Participant ID: P11**
**Gender: Male | Age: 50**
Water is sacred because life itself is sacred.

**Participant ID: P12**
**Gender: Male | Age: 50**
Water is sacred because it enables life.

**Participant ID: P13**
**Gender: Female | Age: 50**
Not sacred, but it reminds me of religious teachings about cleanliness.

**Participant ID: P14**
**Gender: Female | Age: 50**
Ablution, ritual washing, and cleanliness all rely on water, making it sacred.

**Participant ID: P15**
**Gender: Male | Age: 55**
Water is divine mercy; the Qur’an repeatedly emphasizes its life-giving role.

**Participant ID: P16**
**Gender: Male | Age: 61**
Since childhood, we were taught water is sacred and purifying in religious teachings.

**Theme: Cultural, Religious, and Symbolic Meanings of Water**
**Question: What role does water hold in people’s religious, ritual, or cultural beliefs?**

**Participant ID: P1**
**Gender: Male | Age: 68**
Water is very important and sacred for us. For example, when someone goes on a long journey, we pour water behind them so their journey flows smoothly like water and remains safe. Thinking of religion reminds me of purity and ablution, but also of the thirst of Imam Hussein and his companions, which is a sorrowful memory for us.

**Participant ID: P2**
**Gender: Female | Age: 58**
Water cleans impurities and purifies. It symbolizes clarity and purity (aydiniğ).

**Participant ID: P3**
**Gender: Male | Age: 61**
In our culture, water has not yet received the attention it deserves; if people experienced scarcity even for a day, they would appreciate it more.

**Participant ID: P4**
**Gender: Male | Age: 66**
In our village, water is considered lucky and has a special place; people value it greatly.

**Participant ID: P5**
**Gender: Female | Age: 40**
Water is vital and equals life; without it, we die and hygiene fails, so it has a very important role.

**Participant ID: P6**
**Gender: Female | Age: 50**
Religion teaches that everything originated from water. It is very important. But in our culture, people often waste water without realizing its value.

**Participant ID: P7**
**Gender: Male | Age: 45**
The main focus is on purity. Water prepares us for entering sacred spaces (prayer, mosque). Without water, our religious practice is incomplete.

**Participant ID: P8**
**Gender: Female | Age: 50**
In our village culture, water symbolizes livelihood. Houses near springs or streams are highly valued. Cultural heritage emphasizes preserving canals and springs.

**Participant ID: P9**
**Gender: Male | Age: 61**
Water is a symbol of clarity and purity; its value is beyond description.

**Participant ID: P10**
**Gender: Male | Age: 51**
Water represents God’s mercy and brings hope. When it rains, I truly feel God’s presence.

**Participant ID: P11**
**Gender: Male | Age: 50**
Water is vital in both religion and culture; wherever water exists, life and prosperity follow. Cities and settlements often develop around rivers.

**Participant ID: P12**
**Gender: Male | Age: 50**
In Azerbaijan, we feel water more intensely; living in a dry region would create a different perspective. As children we saw lakes; now, without them, we become more sensitive to water scarcity and rainfall.

**Participant ID: P13**
**Gender: Female | Age: 50**
Since our country has limited water, it must be used judiciously; overuse is considered sinful because everyone has a share.

**Participant ID: P14**
**Gender: Female | Age: 50**
Water purifies everything and plays an important role. I consider water, sun, and moon among the three most important things in existence.

**Participant ID: P15**
**Gender: Male | Age: 55**
From childhood, I learned from parents and society that water is God’s mercy, but little formal effort exists in Iran to teach proper water use; most lessons came from parents’ advice.

**Participant ID: P16**
**Gender: Male | Age: 61**
Based on Islamic teachings, water allows purification of body and soul. Ablution is required before prayer or touching the Qur’an, giving water great religious importance; culturally, water holds high status and respect.

**Theme: Cultural, Religious, and Symbolic Meanings of Water**
**Question: What role does water hold in people’s religious, ritual, or cultural beliefs?**

**Participant ID: P1**
**Gender: Male | Age: 68**
Water is very important and sacred for us. For example, when someone goes on a long journey, we pour water behind them so their journey flows smoothly like water and remains safe. Thinking of religion reminds me of purity and ablution, but also of the thirst of Imam Hussein and his companions, which is a sorrowful memory for us.

**Participant ID: P2**
**Gender: Female | Age: 58**
Water cleans impurities and purifies. It symbolizes clarity and purity (aydiniğ).

**Participant ID: P3**
**Gender: Male | Age: 61**
In our culture, water has not yet received the attention it deserves; if people experienced scarcity even for a day, they would appreciate it more.

**Participant ID: P4**
**Gender: Male | Age: 66**
In our village, water is considered lucky and has a special place; people value it greatly.

**Participant ID: P5**
**Gender: Female | Age: 40**
Water is vital and equals life; without it, we die and hygiene fails, so it has a very important role.

**Participant ID: P6**
**Gender: Female | Age: 50**
Religion teaches that everything originated from water. It is very important. But in our culture, people often waste water without realizing its value.

**Participant ID: P7**
**Gender: Male | Age: 45**
The main focus is on purity. Water prepares us for entering sacred spaces (prayer, mosque). Without water, our religious practice is incomplete.

**Participant ID: P8**
**Gender: Female | Age: 50**
In our village culture, water symbolizes livelihood. Houses near springs or streams are highly valued. Cultural heritage emphasizes preserving canals and springs.

**Participant ID: P9**
**Gender: Male | Age: 61**
Water is a symbol of clarity and purity; its value is beyond description.

**Participant ID: P10**
**Gender: Male | Age: 51**
Water represents God’s mercy and brings hope. When it rains, I truly feel God’s presence.

**Participant ID: P11**
**Gender: Male | Age: 50**
Water is vital in both religion and culture; wherever water exists, life and prosperity follow. Cities and settlements often develop around rivers.

**Participant ID: P12**
**Gender: Male | Age: 50**
In Azerbaijan, we feel water more intensely; living in a dry region would create a different perspective. As children we saw lakes; now, without them, we become more sensitive to water scarcity and rainfall.

**Participant ID: P13**
**Gender: Female | Age: 50**
Since our country has limited water, it must be used judiciously; overuse is considered sinful because everyone has a share.

**Participant ID: P14**
**Gender: Female | Age: 50**
Water purifies everything and plays an important role. I consider water, sun, and moon among the three most important things in existence.

**Participant ID: P15**
**Gender: Male | Age: 55**
From childhood, I learned from parents and society that water is God’s mercy, but little formal effort exists in Iran to teach proper water use; most lessons came from parents’ advice.

**Participant ID: P16**
**Gender: Male | Age: 61**
Based on Islamic teachings, water allows purification of body and soul. Ablution is required before prayer or touching the Qur’an, giving water great religious importance; culturally, water holds high status and respect.

**Theme: Cultural, Religious, and Symbolic Meanings of Water**
**Question: Do they perceive a connection between water and concepts like “purity, blessing, life, or sustenance”?**

**Participant ID: P1**
**Gender: Male | Age: 68**
Yes, most people in our city are farmers; without water, the land loses its blessing. Water brings livelihood. Without water, everything dries, and nothing survives.

**Participant ID: P2**
**Gender: Female | Age: 58**
Yes, water is purifying. Life is possible with water, which also brings blessings like rainfall aiding fruit growth.

**Participant ID: P3**
**Gender: Male | Age: 61**
Yes, absolutely. Cleaning my shop with water increases blessing and attracts customers.

**Participant ID: P4**
**Gender: Male | Age: 66**
Yes, for me as a farmer, water is essential because my livelihood depends on it; without water, my fields remain thirsty.

**Participant ID: P5**
**Gender: Female | Age: 40**
Yes, water enables life. Purity is impossible without water; blessings in food and agriculture depend on water.

**Participant ID: P6**
**Gender: Female | Age: 50**
Yes, water purifies and sustains life; crops depend on it.

**Participant ID: P7**
**Gender: Male | Age: 45**
Yes, all four: purity (ablution and washing), life (watering trees), blessing (charity meals), sustenance (God’s mercy).

**Participant ID: P8**
**Gender: Female | Age: 50**
Connection with life is stronger, especially during drought; purity is mostly hygienic in my mind.

**Participant ID: P9**
**Gender: Male | Age: 61**
Yes, exactly.

**Participant ID: P10**
**Gender: Male | Age: 51**
Yes, wherever there is water, there is life and sustenance.

**Participant ID: P11**
**Gender: Male | Age: 50**
Yes, directly connected; without water, nothing exists. Agriculture and livestock die, so no blessing exists.

**Participant ID: P12**
**Gender: Male | Age: 50**
Yes, without washing after work, no purification occurs. Water symbolizes life.

**Participant ID: P13**
**Gender: Female | Age: 50**
Proper water use brings blessings and cleanliness; being clean facilitates social interactions.

**Participant ID: P14**
**Gender: Female | Age: 50**
Yes, completely connected; ablution, prayer, and rain petitions create a spiritual cycle.

**Participant ID: P15**
**Gender: Male | Age: 55**
Blessings, life, and sustenance depend on water; rainfall nurtures earth, rivers, plants, and humans.

**Participant ID: P16**
**Gender: Male | Age: 61**
Yes, water removes impurities; religious teachings emphasize cleanliness and ablution as means to receive blessings.

**Theme: Cultural, Religious, and Symbolic Meanings of Water**
**Question: Do they perceive a connection between water and concepts like “purity, blessing, life, or sustenance”?**

**Participant ID: P1**
**Gender: Male | Age: 68**
Yes, most people in our city are farmers; without water, the land loses its blessing. Water brings livelihood. Without water, everything dries, and nothing survives.

**Participant ID: P2**
**Gender: Female | Age: 58**
Yes, water is purifying. Life is possible with water, which also brings blessings like rainfall aiding fruit growth.

**Participant ID: P3**
**Gender: Male | Age: 61**
Yes, absolutely. Cleaning my shop with water increases blessing and attracts customers.

**Participant ID: P4**
**Gender: Male | Age: 66**
Yes, for me as a farmer, water is essential because my livelihood depends on it; without water, my fields remain thirsty.

**Participant ID: P5**
**Gender: Female | Age: 40**
Yes, water enables life. Purity is impossible without water; blessings in food and agriculture depend on water.

**Participant ID: P6**
**Gender: Female | Age: 50**
Yes, water purifies and sustains life; crops depend on it.

**Participant ID: P7**
**Gender: Male | Age: 45**
Yes, all four: purity (ablution and washing), life (watering trees), blessing (charity meals), sustenance (God’s mercy).

**Participant ID: P8**
**Gender: Female | Age: 50**
Connection with life is stronger, especially during drought; purity is mostly hygienic in my mind.

**Participant ID: P9**
**Gender: Male | Age: 61**
Yes, exactly.

**Participant ID: P10**
**Gender: Male | Age: 51**
Yes, wherever there is water, there is life and sustenance.

**Participant ID: P11**
**Gender: Male | Age: 50**
Yes, directly connected; without water, nothing exists. Agriculture and livestock die, so no blessing exists.

**Participant ID: P12**
**Gender: Male | Age: 50**
Yes, without washing after work, no purification occurs. Water symbolizes life.

**Participant ID: P13**
**Gender: Female | Age: 50**
Proper water use brings blessings and cleanliness; being clean facilitates social interactions.

**Participant ID: P14**
**Gender: Female | Age: 50**
Yes, completely connected; ablution, prayer, and rain petitions create a spiritual cycle.

**Participant ID: P15**
**Gender: Male | Age: 55**
Blessings, life, and sustenance depend on water; rainfall nurtures earth, rivers, plants, and humans.

**Participant ID: P16**
**Gender: Male | Age: 61**
Yes, water removes impurities; religious teachings emphasize cleanliness and ablution as means to receive blessings.

**Theme: Cultural, Religious, and Symbolic Meanings of Water**
**Question: What religious-cultural memories, stories, or narratives about water are alive in people’s minds?**

**Participant ID: P1**
**Gender: Male | Age: 68**
I remember the stories of Imam Hussein and Noah’s Ark.

**Participant ID: P2**
**Gender: Female | Age: 58**
I recall Fatimah’s dowry being water and Imam Hussein’s thirst.

**Participant ID: P3**
**Gender: Male | Age: 61**
A memorable event in Meshginshahr: a flood broke the main water pipe, leaving people without water for days.

**Participant ID: P4**
**Gender: Male | Age: 66**
Hard conditions before easy access to water; people suffered greatly.

**Participant ID: P5**
**Gender: Female | Age: 40**
Heard that Fatimah’s dowry was water; water is sacred in Islam, while fire was sacred in Zoroastrianism.

**Participant ID: P6**
**Gender: Female | Age: 50**
Story of Ibrahim leaving Hagar and Ishmael in the desert; God provides water from Zamzam.

**Participant ID: P7**
**Gender: Male | Age: 45**
Story of Abbas (A.S.) thirsty at the Euphrates; reminds me to be careful with water.

**Participant ID: P8**
**Gender: Female | Age: 50**
Narratives from Karbala, 72 companions of Imam Hussein.

**Participant ID: P9**
**Gender: Male | Age: 61**
Story of thirsty children and companions in Karbala; denial of water to Imam Hussein’s family.

**Participant ID: P10**
**Gender: Male | Age: 51**
My mother told us stories of Moses and the sea.

**Participant ID: P11**
**Gender: Male | Age: 55**
Story of Ishmael receiving Zamzam water.

**Participant ID: P12**
**Gender: Male | Age: 50**
Most vivid story: Karbala and the martyrdom of Imam Hussein; enemies denied water to him and his companions.

**Participant ID: P13**
**Gender: Female | Age: 50**
Visiting Ashura rituals every year reinforces the memory.

**Participant ID: P14**
**Gender: Female | Age: 50**
Childhood memories of playing in rivers during hot summers.

**Participant ID: P15**
**Gender: Male | Age: 55**
Visiting Urmia Lake reminds of childhood experiences.

**Participant ID: P16**
**Gender: Male | Age: 61**
Drinking water after thirst in remembrance of Imam Hussein’s suffering and oppression by Yazid.

**Theme: Decline of Spirituality and Sacredness of Water in Modern Society**
**Question: Do people feel that in today’s society, the spirituality or sacredness of water has declined?**

**Participant ID: P1**
**Gender: Male | Age: 68**
Yes, much less than before. Not only water, many other things too. Today’s youth don’t see water as sacred, so they don’t value it.

**Participant ID: P2**
**Gender: Female | Age: 58**
Yes, modern people pay little attention to such things.

**Participant ID: P3**
**Gender: Male | Age: 61**
Yes, absolutely. I think drought and water scarcity are results of declining sacredness of water over the years. If we could restore its sacredness, much of the water problem would be solved.

**Participant ID: P4**
**Gender: Male | Age: 66**
In cities and provinces, yes, it has declined, but in our village, water’s sacredness has not decreased because we have experienced scarcity and appreciate it more.

**Participant ID: P5**
**Gender: Female | Age: 40**
Yes, nowadays water is easily accessible, so it has lost value. In the past, during the Shah’s era, water was delivered by tankers and valued more. Even today, in provinces like Sistan and Baluchestan, scarcity makes people appreciate it more.

**Participant ID: P6**
**Gender: Female | Age: 50**
Yes, very much. Now water is just considered a resource to meet needs. In the past, our village had a spring, now it’s gone, replaced by piped water for which we pay.

**Participant ID: P7**
**Gender: Male | Age: 45**
Yes, severely. People get water from taps now; no need for springs or qanats. Since effort is removed, respect has decreased.

**Participant ID: P8**
**Gender: Female | Age: 50**
Yes, in the past we carried water home manually, so we treated it with care and it had special sacredness; now, because it’s easy to obtain, people don’t pay attention.

**Participant ID: P9**
**Gender: Male | Age: 61**
Yes, among youth, access to water and declining religiosity has reduced the sacredness and spirituality of water, like other religious practices.

**Participant ID: P10**
**Gender: Male | Age: 51**
Now many treat water as ordinary.

**Participant ID: P11**
**Gender: Male | Age: 50**
Yes, because beliefs have weakened, water is no longer sacred; otherwise, people wouldn’t waste it even with scarcity.

**Participant ID: P12**
**Gender: Male | Age: 50**
Yes, just as children learn from parents, the government also disregards water; for example, Lake Urmia dried up. People don’t care either.

**Participant ID: P13**
**Gender: Female | Age: 50**
Yes, in the past, with scarce taps, we valued water greatly; now, especially youth, having easy access, don’t.

**Participant ID: P14**
**Gender: Female | Age: 50**
Yes, previously, we bathed with little water; now people don’t value it. Previously, qanats and effort gave water high value; piped water availability reduced this perception.

**Participant ID: P15**
**Gender: Male | Age: 55**
Daily life and economic pressures are so consuming that most people don’t think about the sacredness of water. Everyone works to meet their family’s needs and pays less attention to water or environment.

**Participant ID: P16**
**Gender: Male | Age: 61**
I think modern people, especially youth, have forgotten or undervalued things we once cherished. They care little about conserving water, more focused on internet and phones than learning its importance.

**Theme: Causes of the Transformation of Water from Sacred Element to Economic/Consumable Resource**
**Question: What factors do they think caused water to change from “sacred element” to “consumable/economic resource”?**

**Participant ID: P1**
**Gender: Male | Age: 68**
In the past, we walked far to reach a spring and fill water; now access is easy, so sacredness is forgotten.

**Participant ID: P2**
**Gender: Female | Age: 58**
People’s problems are so many that belief in sacredness weakened; they only consume water and don’t see it as blessing.

**Participant ID: P3**
**Gender: Male | Age: 61**
Because water is not prioritized, people neglect it.

**Participant ID: P4**
**Gender: Male | Age: 66**
I agree. We focus on money; I think only of irrigating fields to earn money. Must also respect blessings and earn without wasting.

**Participant ID: P5**
**Gender: Female | Age: 40**
Availability; even villages now have piped and purified water.

**Participant ID: P6**
**Gender: Female | Age: 50**
People have become selfish, using water only for their benefit.

**Participant ID: P7**
**Gender: Male | Age: 45**
Water is now monetized; spiritual value is forgotten. Telling someone to save water, they say “I’ll pay for it.”

**Participant ID: P8**
**Gender: Female | Age: 50**
Easy access; we see water as a commodity rather than divine source, removing sacredness.

**Participant ID: P9**
**Gender: Male | Age: 61**
When society values everything monetarily, water becomes a purely material commodity; materialism reduces sacredness in all areas.

**Participant ID: P10**
**Gender: Male | Age: 51**
Urbanization, advertisements, materialism, busy lives, easy access to water.

**Participant ID: P11**
**Gender: Male | Age: 50**
Dual cause: government sells water opportunistically, people think “I’ll pay,” so don’t conserve. Beliefs also weakened, contributing.

**Participant ID: P12**
**Gender: Male | Age: 50**
Children are raised to expect everything; hence the same view toward water.

**Participant ID: P13**
**Gender: Female | Age: 50**
Everyone gets water easily; compare it to money, “I’ll pay for it, so I can use it.”

**Participant ID: P14**
**Gender: Female | Age: 50**
Because water is always available via pipes; previously, one well served each village family.

**Participant ID: P15**
**Gender: Male | Age: 55**
Water has always been important; villages near rivers existed. Today, population growth and economic development cause people to ignore sacredness, focusing on income and industry, without planning for sustainable water use.

**Participant ID: P16**
**Gender: Male | Age: 61**
In the past, we labored to bring water to fields and households, valuing it greatly; now with machines, access is easy, so water loses sacred value and becomes a mere consumable.

**Theme: Impact of Changing Water Meaning on Environmental Behavior and Attitudes**
**Question: How has this change in meaning affected people’s behavior and attitudes toward nature and the environment?**

**Participant ID: P1**
**Gender: Male | Age: 68**
They don’t conserve; such things are unimportant.

**Participant ID: P2**
**Gender: Female | Age: 58**
Water is misused, causing drought; wasting water harms nature.

**Participant ID: P3**
**Gender: Male | Age: 61**
Ignoring one vital resource like water leads to neglect of nature and environmental damage.

**Participant ID: P4**
**Gender: Male | Age: 66**
Focusing only on economics affects behavior; we view nature economically. In our village, trees were cut for sale.

**Participant ID: P5**
**Gender: Female | Age: 40**
I think behavior toward nature may not relate to water’s changed meaning; people think of self-interest and agricultural gain.

**Participant ID: P6**
**Gender: Female | Age: 50**
Just as we pay for injections, same with nature; mountains are sold.

**Participant ID: P7**
**Gender: Male | Age: 45**
People think water is endless from the tap; they become indifferent to nature, ignoring forests and rivers.

**Participant ID: P8**
**Gender: Female | Age: 50**
Treating water as commodity reduces sense of responsibility; wasting it is like throwing paper, not harming nature, unlike the past.

**Participant ID: P9**
**Gender: Male | Age: 61**
People appreciate water less, overconsume, and use it for display; swimming pools or water features show social status. Water is now a purely material commodity.

**Participant ID: P10**
**Gender: Male | Age: 51**
When water loses sacredness and is delivered via piping without discussion of transcendental importance, it gets wasted.

**Participant ID: P11**
**Gender: Male | Age: 50**
I don’t think it affects nature view. Though monetized, functionality remains; water is still important, e.g., land purchase considers water availability.

**Participant ID: P12**
**Gender: Male | Age: 50**
Just as water is undervalued, trees are cut or stolen for personal gain; sometimes water scarcity drives theft.

**Participant ID: P13**
**Gender: Female | Age: 50**
Previously, water symbolized life and prosperity; now even remote locations have daily water needs met.

**Participant ID: P14**
**Gender: Female | Age: 50**
Younger generation doesn’t value water or nature; they are comfort-oriented, unlike older times.

**Participant ID: P15**
**Gender: Male | Age: 55**
When people live in comfort and don’t struggle for water, they care less about protecting water resources and environment; without law, people could destroy nature in a year.

**Participant ID: P16**
**Gender: Male | Age: 61**
This shift has increased arbitrary water consumption; people use water as much as they want without considering its value.

**Theme: Link Between Spiritual Understanding and Responsible Water Behavior**
**Question: Can a spiritual understanding of water lead to more ethical or responsible behavior in its use and conservation?**

**Participant ID: P1**
**Gender: Male | Age: 68**
Certainly, but only if there are beliefs.

**Participant ID: P2**
**Gender: Female | Age: 58**
Yes, if you believe in God and His blessings, you won’t waste water.

**Participant ID: P3**
**Gender: Male | Age: 61**
Yes, absolutely. Someone who has experienced scarcity and values water will change their behavior.

**Participant ID: P4**
**Gender: Male | Age: 66**
Yes. Understanding that conserving water and avoiding waste increases blessings and lawful sustenance makes one more careful in water use and with nature.

**Participant ID: P5**
**Gender: Female | Age: 40**
Yes, if people understand, they will think before using water; conscience intervenes.

**Participant ID: P6**
**Gender: Female | Age: 50**
Yes, education in schools is necessary; future generations will be better than today.

**Participant ID: P7**
**Gender: Male | Age: 45**
Certainly. If one sees water as a divine blessing, they know every drop is valuable. This understanding encourages water conservation.

**Participant ID: P8**
**Gender: Female | Age: 50**
Since water affects both daily life and my income (agriculture), I want to protect it and use it carefully.

**Participant ID: P9**
**Gender: Male | Age: 61**
Yes. A sense of religious responsibility affects all aspects of human life.

**Participant ID: P10**
**Gender: Male | Age: 51**
Naturally, if we consider water sacred, we will care more for this great blessing.

**Participant ID: P11**
**Gender: Male | Age: 50**
If everyone understands water’s sacredness, they will use it correctly, but few people know this.

**Participant ID: P12**
**Gender: Male | Age: 50**
A deep question. When spirituality is discussed, we must first see if spirituality exists at all. I remember a story: a man on horseback met a blind man, helped him, but the blind man stole the horse. The owner said: “Remember, you didn’t just steal a horse, you stole humanity and goodness!” Our society has lost control and spirituality. If spirituality existed, people would understand that wasting water displeases God—but first, we need someone who truly believes in God.

**Participant ID: P13**
**Gender: Male | Age: 50**
If we know how water is produced and how hard it is, we use it more carefully—not just take a hose and waste it. Money isn’t the issue; water is very valuable.

**Participant ID: P14**
**Gender: Female | Age: 50**
Yes, authorities and TV must teach people to value water. Even pricing it higher if necessary. Water shouldn’t always be freely available.

**Participant ID: P15**
**Gender: Female | Age: 50**
Yes; when water is sacred and valuable, people respect it and use it properly so there is enough for everyone, including future generations. Spiritual understanding of water requires education in families and textbooks.

**Participant ID: P16**
**Gender: Male | Age: 61**
Yes; in my family, we were always told that water is God’s blessing, and wasting it displeases Him. Teachers also taught the importance and sacredness of water. Therefore, I have always tried to use water moderately and teach my family to avoid waste.

**Theme: Relationship Between Religious Faith and Environmental Responsibility**
**Question: How do individuals describe the relationship between religious faith and their environmental behavior?**

**Participant ID: P1**
**Gender: Male | Age: 68**
If we see water as a divine blessing, we won’t neglect conserving it.

**Participant ID: P2**
**Gender: Female | Age: 58**
God tells us not to waste blessings, so we must use them properly.

**Participant ID: P3**
**Gender: Male | Age: 61**
Religious faith provides the framework for behavior; it guides us to carefully use water and protect the environment.

**Participant ID: P4**
**Gender: Male | Age: 66**
We are all Muslims; our religion advises saving and not wasting, so we must act responsibly toward the environment.

**Participant ID: P5**
**Gender: Female | Age: 40**
More conscience than religion! Religion hasn’t affected my behavior with water.

**Participant ID: P6**
**Gender: Female | Age: 50**
Not about religion; I accept religion, but water is natural and innate. My nature tells me to use it properly.

**Participant ID: P7**
**Gender: Male | Age: 45**
Faith requires preserving God’s creations; strong faith leads to good environmental behavior.

**Participant ID: P8**
**Gender: Female | Age: 50**
I see them connected: believing we are stewards of the Earth makes me responsible.

**Participant ID: P9**
**Gender: Male | Age: 61**
Following religious and divine instructions naturally leads to valuing and protecting water. There’s a strong link between faith and environmental behavior.

**Participant ID: P10**
**Gender: Male | Age: 51**
Preserving water and appreciating God’s blessings is a form of worship, especially as water brings vitality.

**Participant ID: P11**
**Gender: Male | Age: 50**
Religion advises optimal use and avoiding waste; the more devout, the more careful.

**Participant ID: P12**
**Gender: Male | Age: 50**
I am religious but try to act based on humanity rather than faith. Even without religion, I would value water.

**Participant ID: P13**
**Gender: Female | Age: 50**
I try to use water in a way that avoids sin; we distinguish between Muslims and non-Muslims in this.

**Participant ID: P14**
**Gender: Female | Age: 50**
Previously, living in a rented house without piped water was difficult; we valued water more then.

**Participant ID: P15**
**Gender: Male | Age: 55**
Faith and religious beliefs affect our environmental behavior; knowing trees and water are divine creations makes us avoid misuse.

**Participant ID: P16**
**Gender: Male | Age: 61**
In the village, when rain was low or rivers dried, we felt the importance of water more than ever, and paid more attention to conserving it.

**Theme: Spiritual and Ethical Reactions to Drought, Scarcity, and Water Pollution**
**Question: What personal experiences with drought, water scarcity, or pollution evoke spiritual or ethical feelings in them?**

**Participant ID: P1**
**Gender: Male | Age: 68**
Visiting Bigloo forest, sometimes the dam is full of trash—though the wind moves it—but why do people do that? It’s ungrateful.

**Participant ID: P2**
**Gender: Female | Age: 58**
When water is cut off in the city, I cannot wash dishes or use the toilet; I appreciate water more and realize we face scarcity.

**Participant ID: P3**
**Gender: Male | Age: 61**
Experiencing thirst makes water valuable; seeing dried rivers is shocking and upsetting.

**Participant ID: P4**
**Gender: Male | Age: 66**
Scarcity and drought are distressing, especially as a farmer whose livelihood depends on water; watching crops suffer is painful.

**Participant ID: P5**
**Gender: Female | Age: 40**
In our city, rainfall is usually high, but during dry periods, lack of rain was worrying; I imagined possible conflicts over water.

**Participant ID: P6**
**Gender: Female | Age: 50**
I haven’t faced drought as I live in a water-rich region, but in dry summers, we were more careful in usage.

**Participant ID: P7**
**Gender: Male | Age: 45**
Feeling guilty; as if God is testing us and we have failed. This prompts repentance and behavior correction.

**Participant ID: P8**
**Gender: Female | Age: 50**
Feeling sorrow and worry; when rivers dry, part of life and beauty is lost, reminding me of God.

**Participant ID: P9**
**Gender: Male | Age: 61**
Feeling anxiety and guilt when witnessing drought; worry about future due to neglecting water’s value.

**Participant ID: P10**
**Gender: Male | Age: 51**
Worry, sadness, and guilt from not preserving nature and being ungrateful for God’s greatest blessing.

**Participant ID: P11**
**Gender: Male | Age: 50**
Water cuts were inconvenient, affecting hygiene and food. Seeing Lake Urmia dry is heartbreaking; people’s greed and private wells caused its destruction.

**Participant ID: P12**
**Gender: Male | Age: 50**
Scarcity and lake drying make me more sensitive; I reduce usage to a minimum as a symbolic measure.

**Participant ID: P13**
**Gender: Female | Age: 50**
Previously living in a house without piped water was hard; we valued water more.

**Participant ID: P14**
**Gender: Female | Age: 50**
Living in water-rich areas, when traveling to dry regions or deserts, we appreciate our town and water more.

**Participant ID: P15**
**Gender: Male | Age: 55**
Hearing about drying dams worries me; I feel we haven’t valued sacred water or planned for its conservation, and I feel guilty.

**Participant ID: P16**
**Gender: Male | Age: 61**
When in village life, low rainfall or dried rivers made us value water greatly and pay more attention to proper use.
