# Supplementary material
Source: Research Square preprint supplement (doi:10.21203/rs.3.rs-9692121/v1)
Supplement: Supplementary file 2 [file baf227fafe81288d6561b4eb.docx]

**Semi-Structured Interview**

**Interviewer Guidelines**

Before initiating the interview, the interviewer should establish a calm, respectful, and trust-based environment to facilitate open communication. The purpose of the study must be clearly explained to the participant, emphasizing the voluntary nature of participation, confidentiality of responses, and anonymity of identity. Informed consent should be obtained prior to the commencement of the interview.

The interviewer should conduct the interview in a semi-structured and conversational manner. While the guiding questions provide a general framework, flexibility should be maintained in the order, wording, and depth of questions based on the flow of the conversation. The following questions served as guiding prompts rather than fixed items and were adapted flexibly during the interviews to elicit rich, experience-based narratives. The interviewer is encouraged to use probing questions such as “Could you elaborate more?”, “Can you give an example?”, or “What did this experience mean to you?” to gain deeper insights into participants’ lived experiences.

It is essential to avoid leading, suggestive, or judgmental questions. The interviewer should maintain a neutral stance and actively listen to the participant. Attention should also be given to non-verbal cues, and sufficient time should be allowed for participants to fully express their thoughts and experiences.

At the end of the interview, the participant should be thanked for their contribution and given the opportunity to add any additional comments or reflections that may not have been covered during the interview.

**Theme 1: Lived Experience and Personal Perception of Water**

1. Can you describe a typical day in your life and how water is present in your daily activities?
2. Can you recall a specific experience with water that was meaningful or memorable for you?
3. Have there been moments when water felt more than just a physical resource? Can you describe such experiences?
4. How did you feel in those moments, and what did water represent for you?

**Theme 2: Cultural and Religious Symbolism of Water**

1. Can you describe any cultural or religious practices in your life where water plays an important role?
2. Can you share an experience where water was connected to ideas such as purity, blessing, or life?
3. How have these cultural or religious experiences influenced the way you use or think about water in your daily life?
4. Are there any stories, memories, or traditions related to water that have stayed with you over time?

**Theme 3: Transformation of Meaning in Contemporary Context**

1. Have you noticed any changes over time in how people around you perceive or value water?
2. Can you describe situations where water is treated mainly as a practical or economic resource rather than something meaningful or symbolic?
3. How have these changes influenced your own attitudes or behaviors toward water or the environment?

**Theme 4: Interconnection between Spirituality and Social Practice**

1. Based on your experiences, do you think seeing water as something meaningful or sacred affects how people treat it? Can you give an example?
2. How do your personal beliefs or values influence your behavior toward water and the environment?
3. Can you describe any personal experiences with water scarcity, drought, or pollution and how they affected your feelings or thoughts?

**Probing prompts (if needed)**

- Could you explain that in more detail?
- Can you give a concrete example?
- How did that experience make you feel?
- What did that moment mean to you?
- Why do you think that is important?
- Can you clarify what you meant by that?
